# Supplementary material
Source: PubMed Central journal article supplement (PMC6032350)
Supplement: PRO-27-1252-s001.pdf [file PRO-27-1252-s001.pdf]

## Supplemental Material

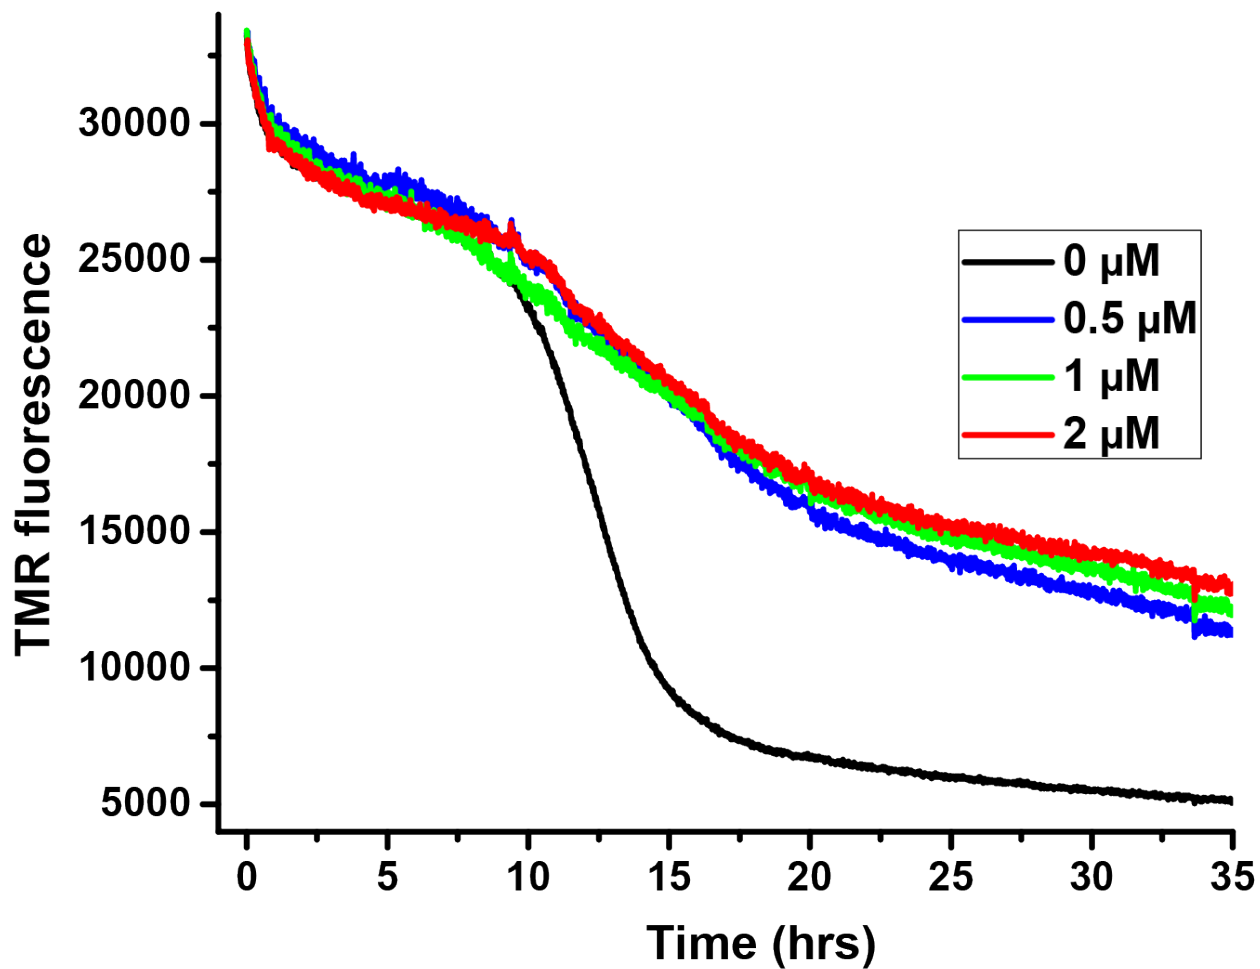

**Figure S1: Demonstration of the reproducibility of the kinetic traces from the TMR assay.** In each run, 8  $\mu\text{M}$   $\text{A}\beta_{42}$  molecules were incubated with different amounts of M-TTR (see legend) as the start of the kinetics assay. The fluorescence intensity is shown in arbitrary units.

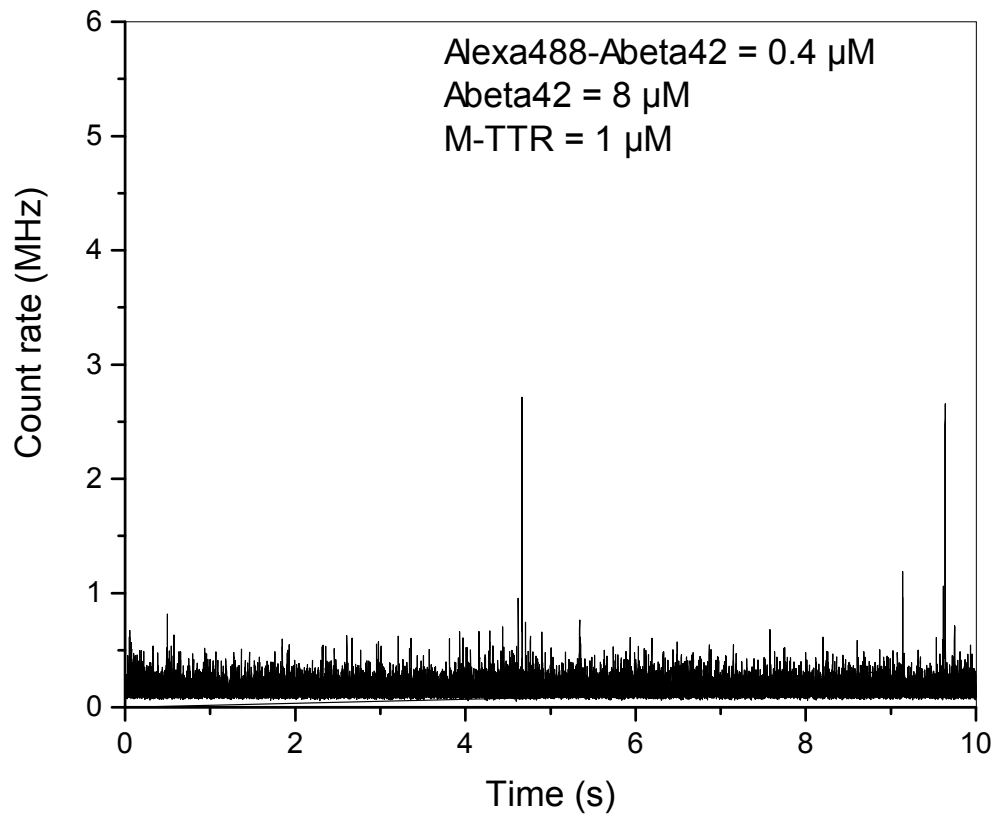

**Figure S2A: Fluorescence burst analysis recorded in the A $\beta$ 42 channel, which shows a suppression of bursts in the presence of 1  $\mu$ M M-TTR.**

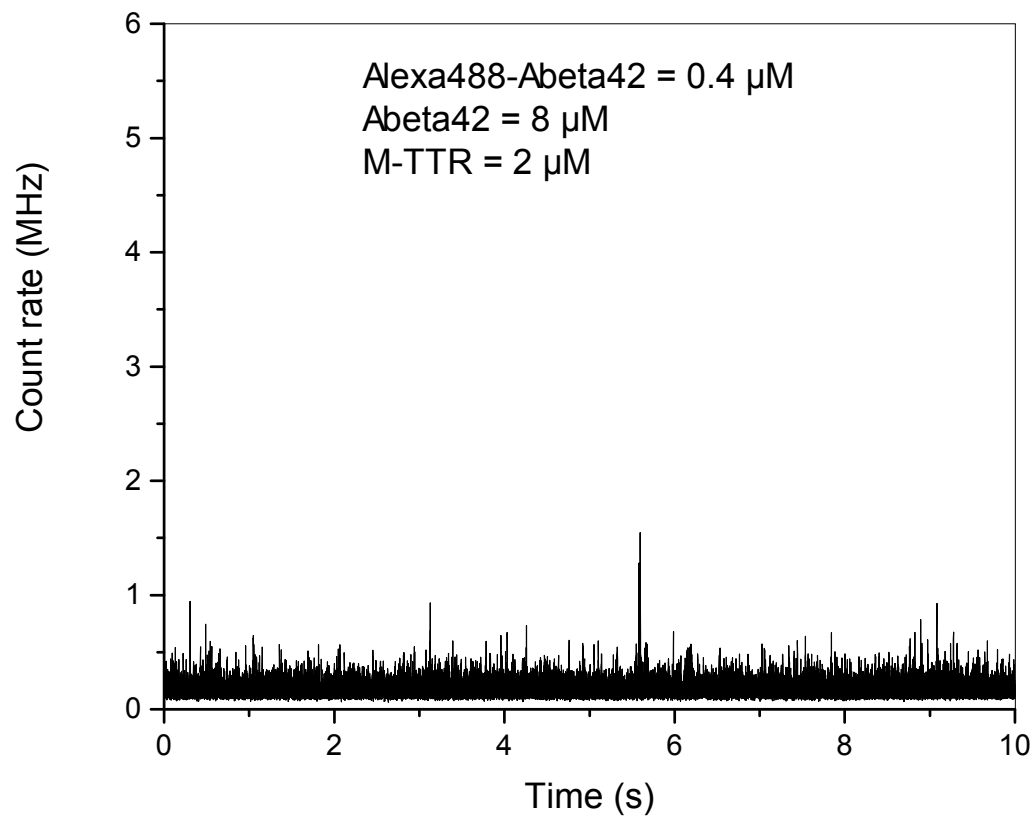

**Figure S2B: Fluorescence burst analysis recorded in the A $\beta$ 42 channel, which shows a suppression of bursts in the presence of 2  $\mu$ M M-TTR.**
